# Supplementary material for: Simultaneous determination of the concentration and enantiomeric excess of amino acids with a coumarin-derived achiral probe
Source: Royal Society of Chemistry journal article supplement (doi:10.1039/d1ay00271f), 2021-01-01
Supplement: d1ay00271f1.pdf [file d1ay00271f1.pdf]

## **Supporting Information**

### **Simultaneous determination of concentration and enantiomeric excess of amino acids with a coumarin-derived achiral probe**

Lamei Yang, Feng Luo and Weili Wei\*

\*School of Pharmaceutical Sciences, Chongqing University, Chongqing, 401331, P.  
R. China.

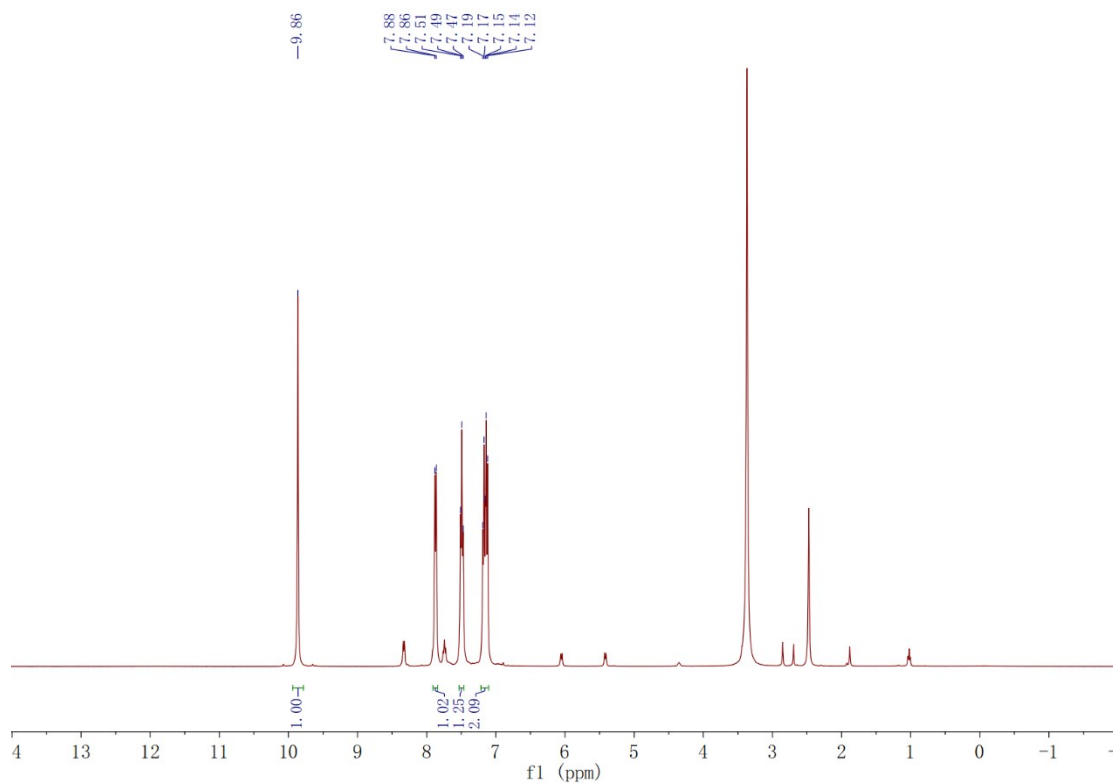

Fig. S1.  $^1\text{H}$  NMR Spectrum of probe 1 in  $\text{DMSO-}d_6$ .

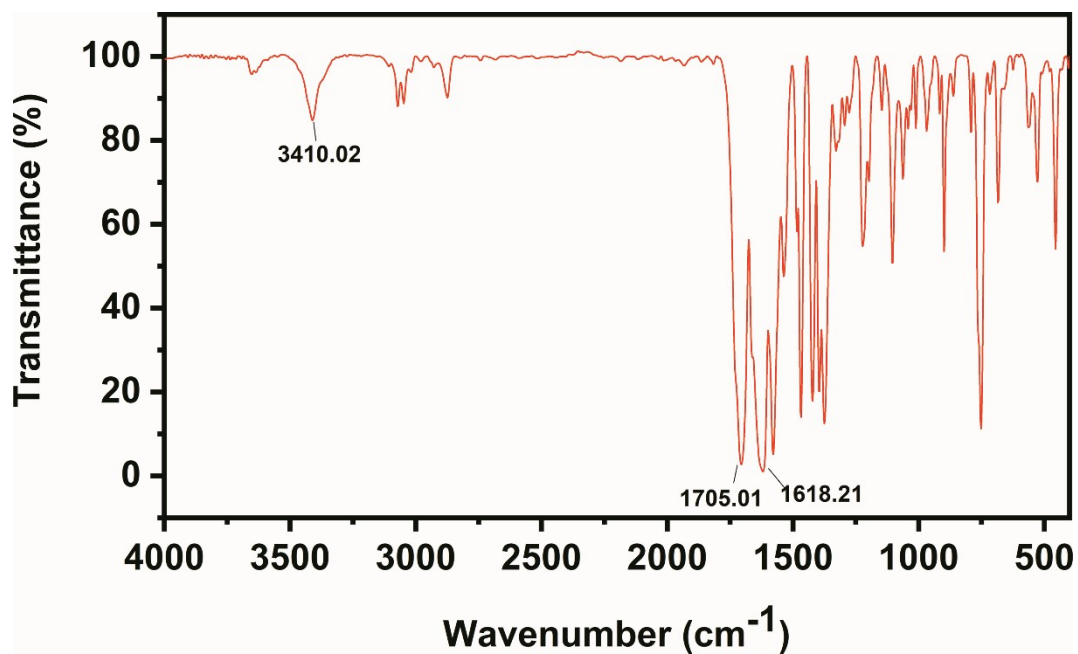

Fig. S2. IR spectrum of probe 1.

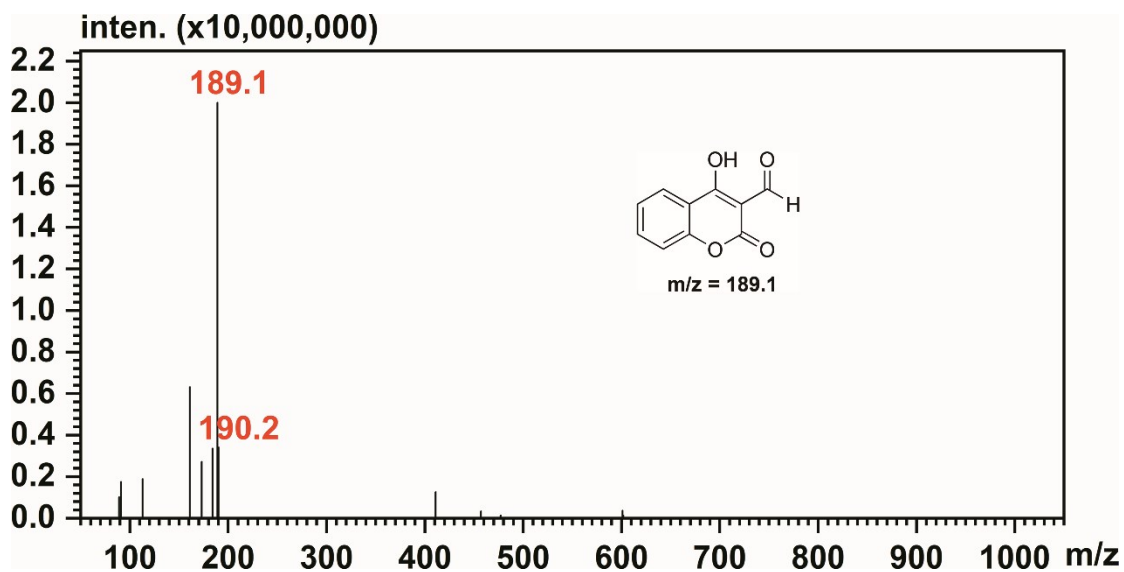

Fig. S3. ESI-MS spectrum of probe 1 (negative ion mode).

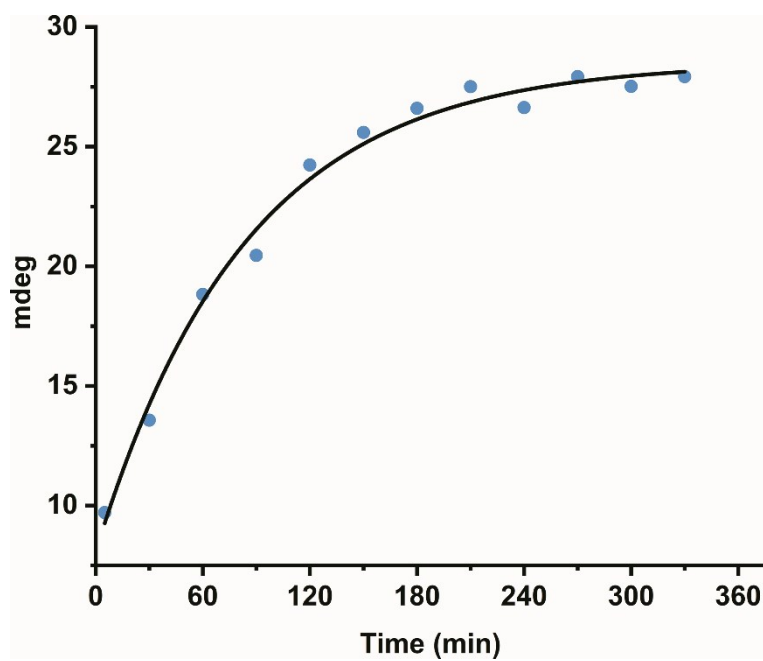

Fig. S4. CD analysis of the reaction between D-Phe and probe 1. (CD signals were collected at 318 nm)

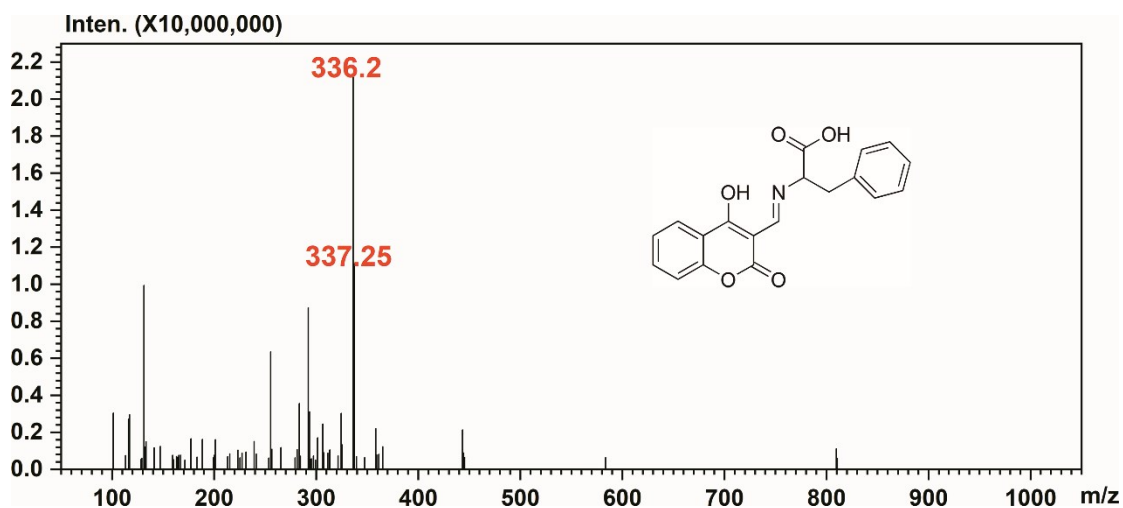

**Fig. S5.** ESI-MS spectrum of the reaction between L-Phe (5.0 mM) and probe **1** (5.0 mM) (negative ion mode).

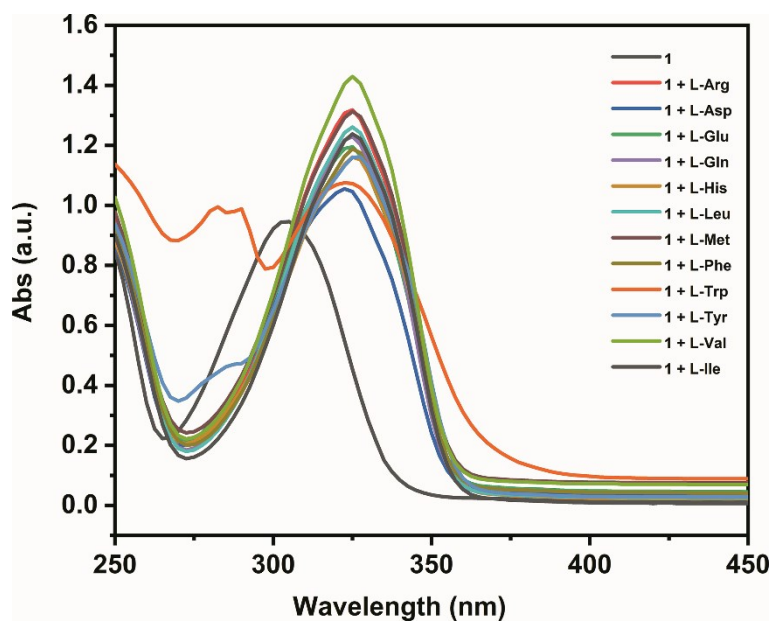

**Fig. S6.** UV-vis spectra obtained from probe **1** with amino acids.

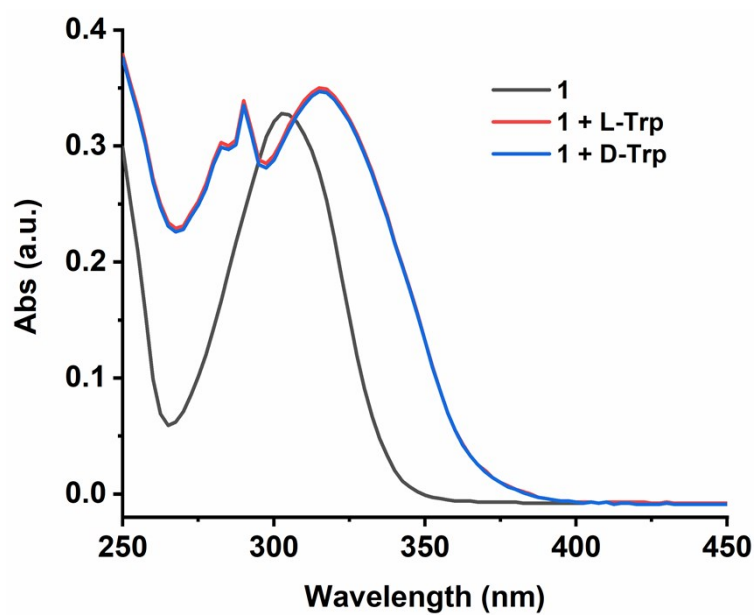

**Fig. S7.** UV-vis spectra obtained from probe **1** with L-Trp (red), D-Trp (blue) and probe **1** (black).

(UV-vis measurements were taken at 50  $\mu$ M after diluting with methanol)

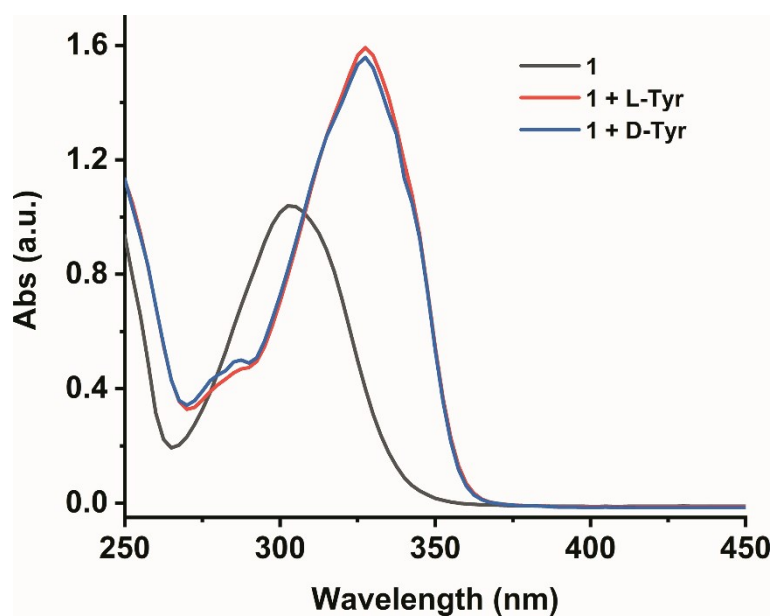

**Fig. S8.** UV-vis spectra obtained from probe **1** with L-Tyr (red), D-Tyr (blue) and probe **1** (black).

(UV-vis measurements were taken at 125  $\mu$ M after diluting with methanol)

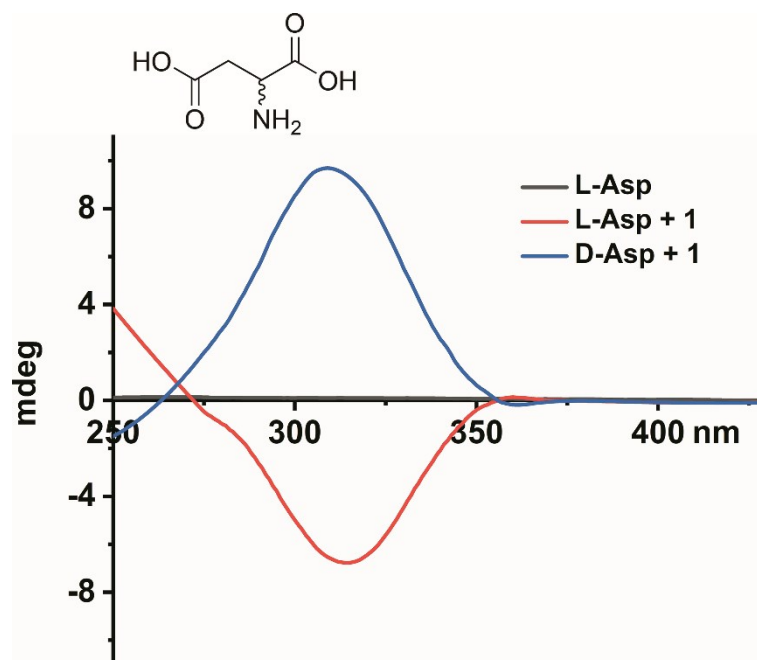

**Fig. S9.** CD spectra obtained from probe 1 with L-Asp (red), D-Asp(blue) and L-Asp(black). (CD measurements were taken at 250  $\mu$ M after diluting with methanol)

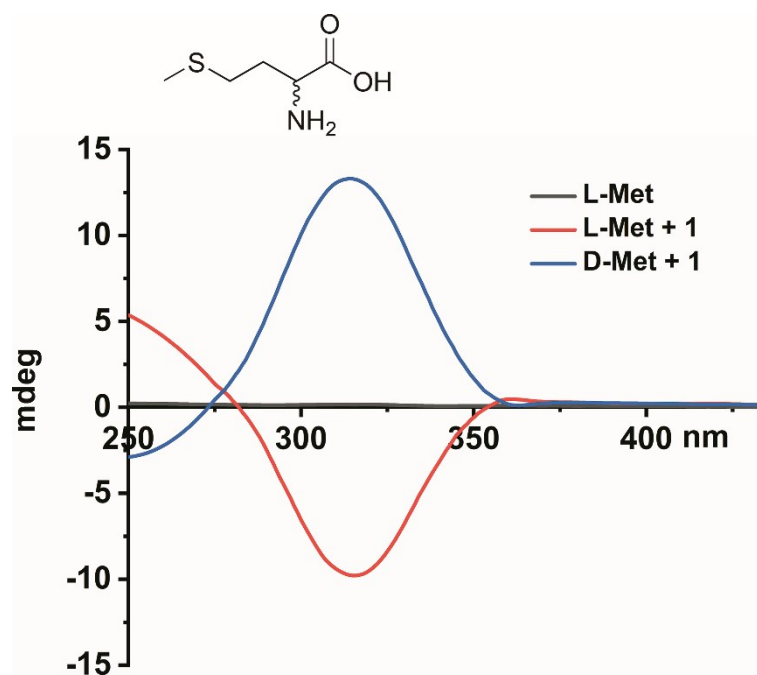

**Fig. S10.** CD spectra obtained from probe 1 with L-Met (red), D-Met(blue) and L-Met (black). (CD measurements were taken at 250  $\mu$ M after diluting with methanol)

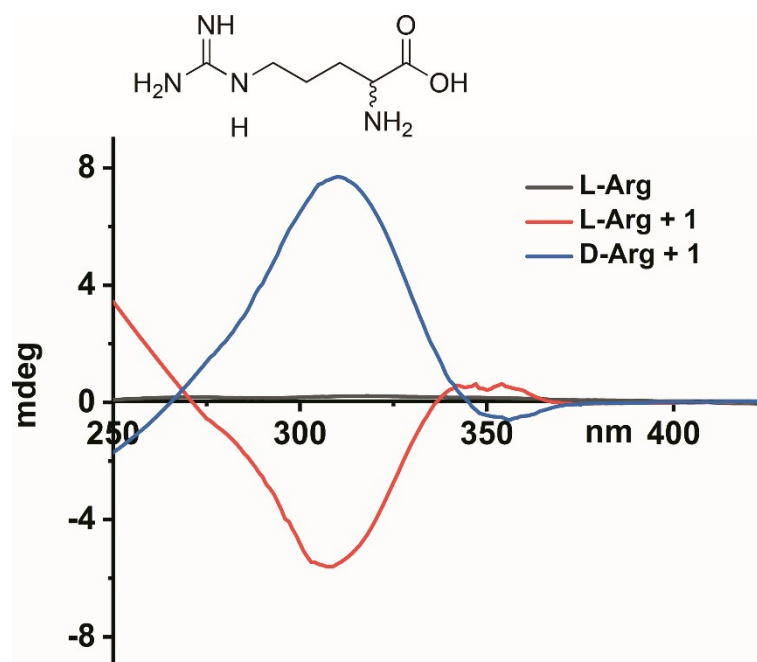

**Fig.S11.** CD spectra obtained from probe **1** with L-Arg (red), D-Arg (blue) and L-Arg (black). (CD measurements were taken at 250  $\mu$ M after diluting with methanol)

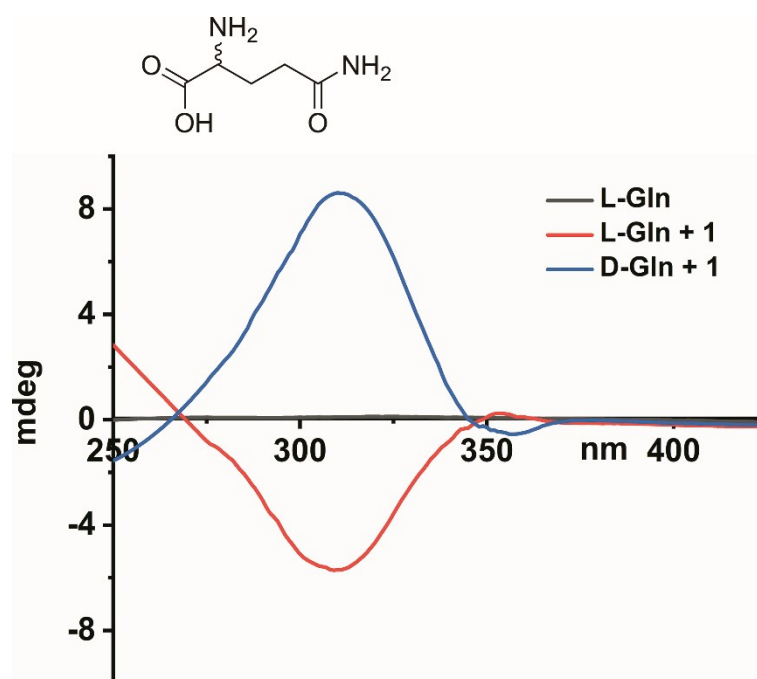

**Fig. S12.** CD spectra obtained from probe **1** with L-Gln (red), D-Gln (blue) and L-Gln (black). (CD measurements were taken at 250  $\mu$ M after diluting with methanol)

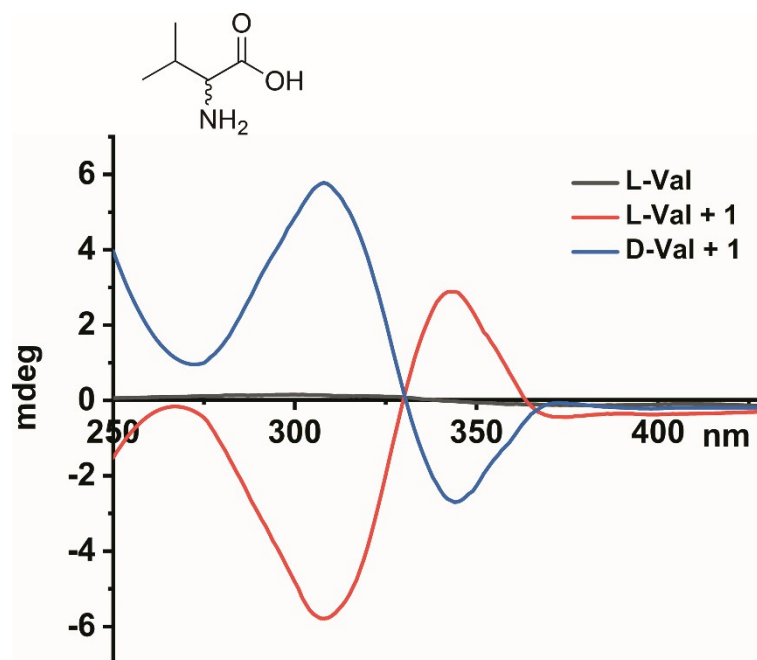

**Fig. S13.** CD spectra obtained from probe **1** with L-Val (red), D-Val(blue) and L-Val (black). (CD measurements were taken at 250  $\mu$ M after diluting with methanol)

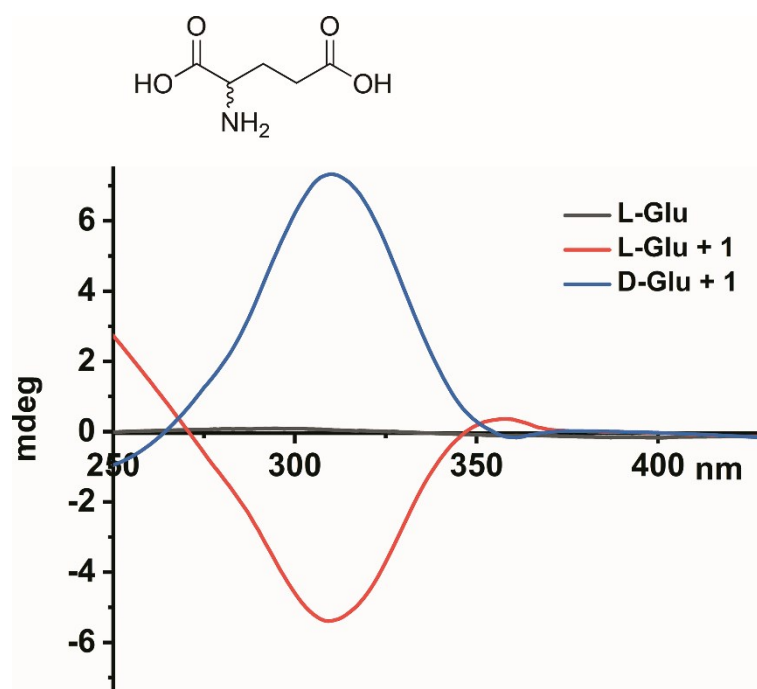

**Fig. S14.** CD spectra obtained from probe **1** with L-Glu (red), D-Glu (blue) and L-Glu (black). (CD measurements were taken at 250  $\mu$ M after diluting with methanol)



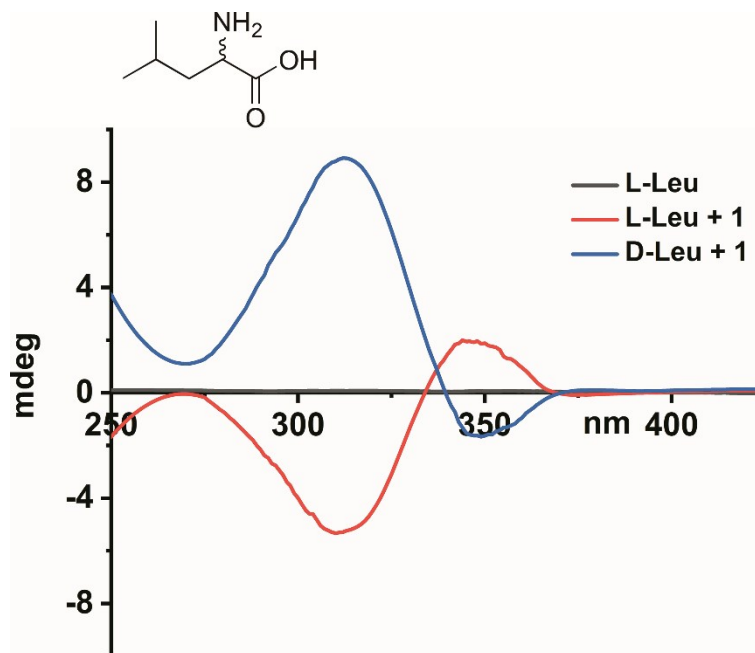

**Fig. S15.** CD spectra obtained from probe **1** with L-Leu (red), D-Leu (blue) and L-Leu (black). (CD measurements were taken at 250  $\mu$ M after diluting with methanol)

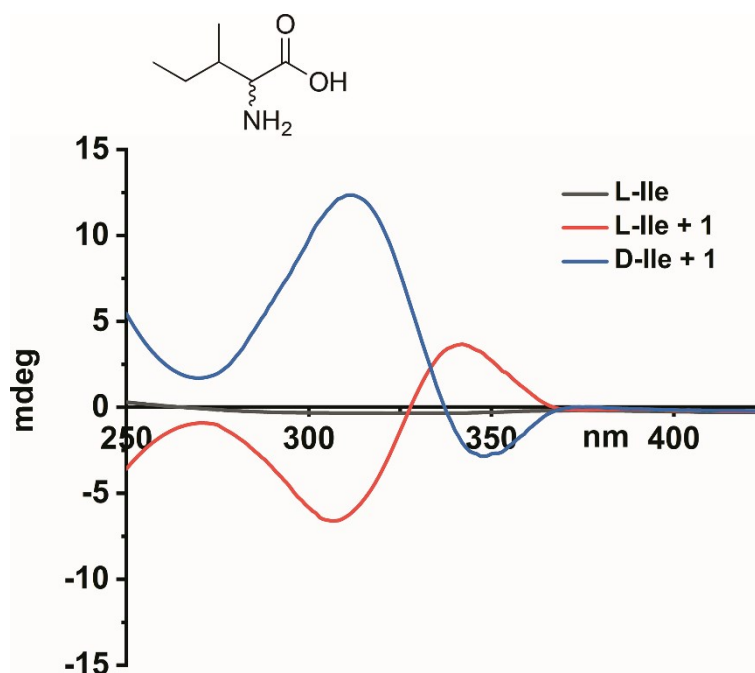

**Fig. S16.** CD spectra obtained from probe **1** with L-Ile (red), D-Ile (blue) and L-Ile (black). (CD measurements were taken at 250  $\mu$ M after diluting with methanol)

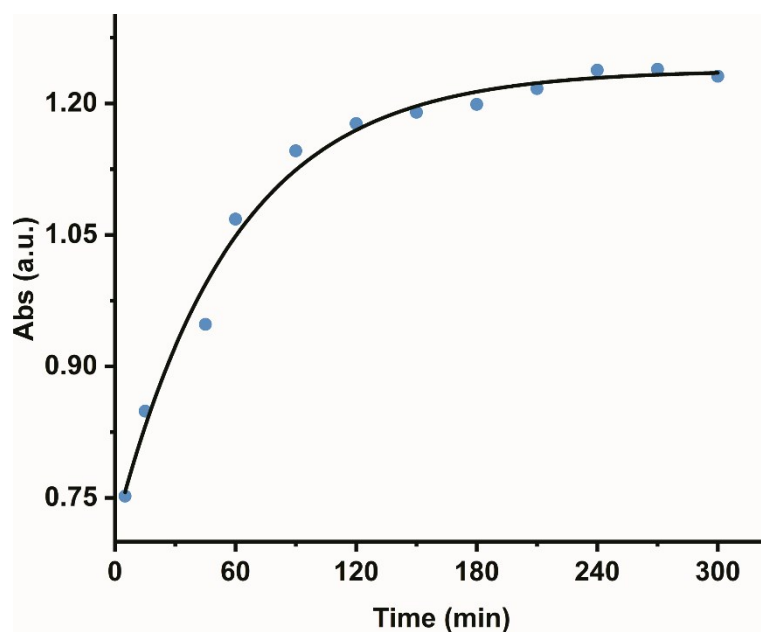

**Fig. S17.** UV-vis analysis of the reaction between L-Arg and probe **1**. (UV-vis signals were collected at 325 nm)

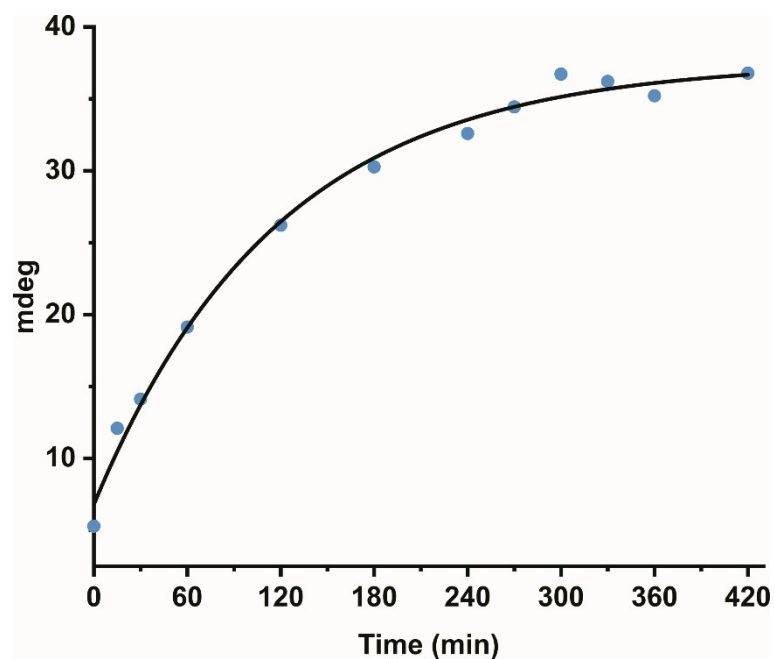

**Fig. S18.** CD analysis of the reaction between D-Trp and probe **1**. (CD signals were collected at 336 nm)

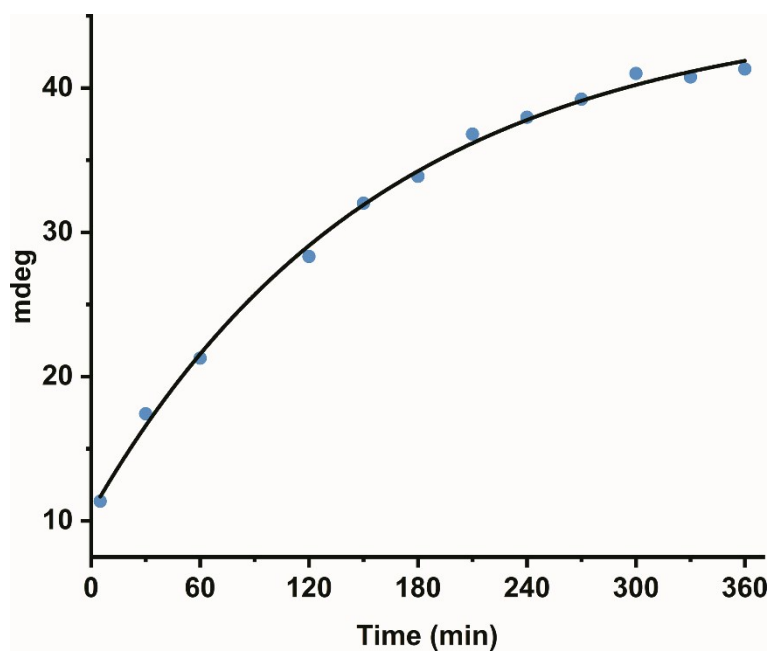

**Fig. S19.** CD analysis of the reaction between D-Tyr and probe **1**. (CD signals were collected at 323 nm)

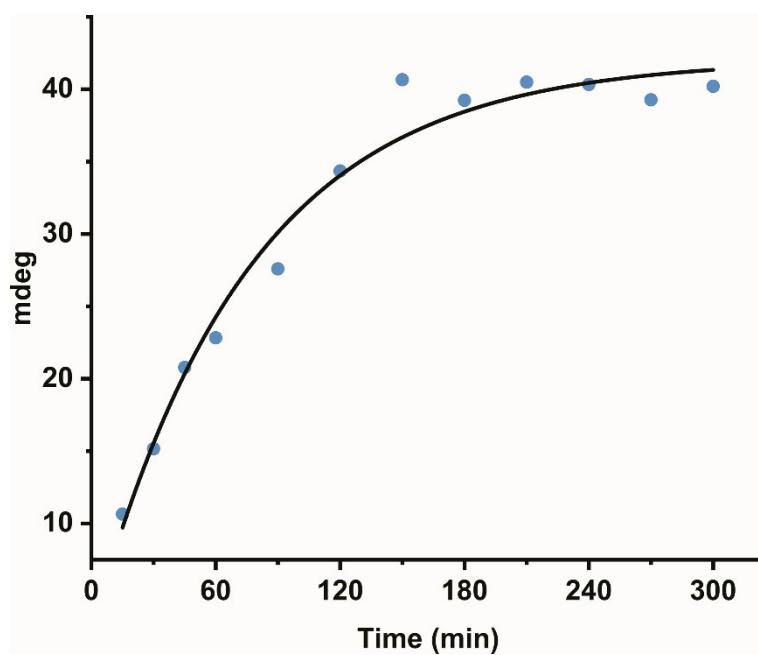

**Fig. S20.** CD analysis of the reaction between D-Tyr and probe **1** at 45°C. (CD signals were collected at 323 nm)

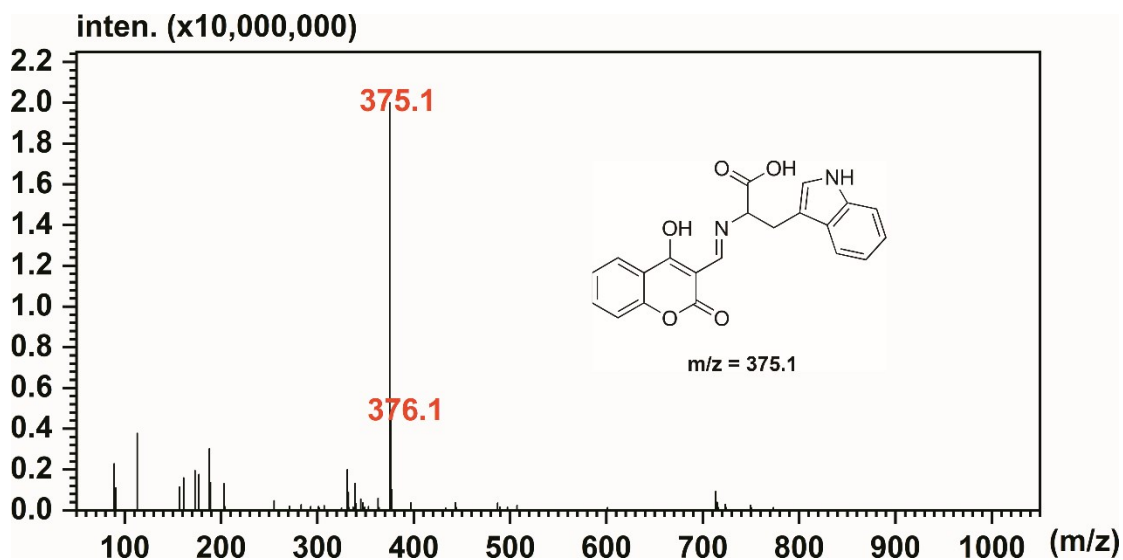

Fig. S21. ESI-MS spectrum of the reaction between L-Trp (5.0 mM) and probe **1** (5.0 mM) (negative ion mode).

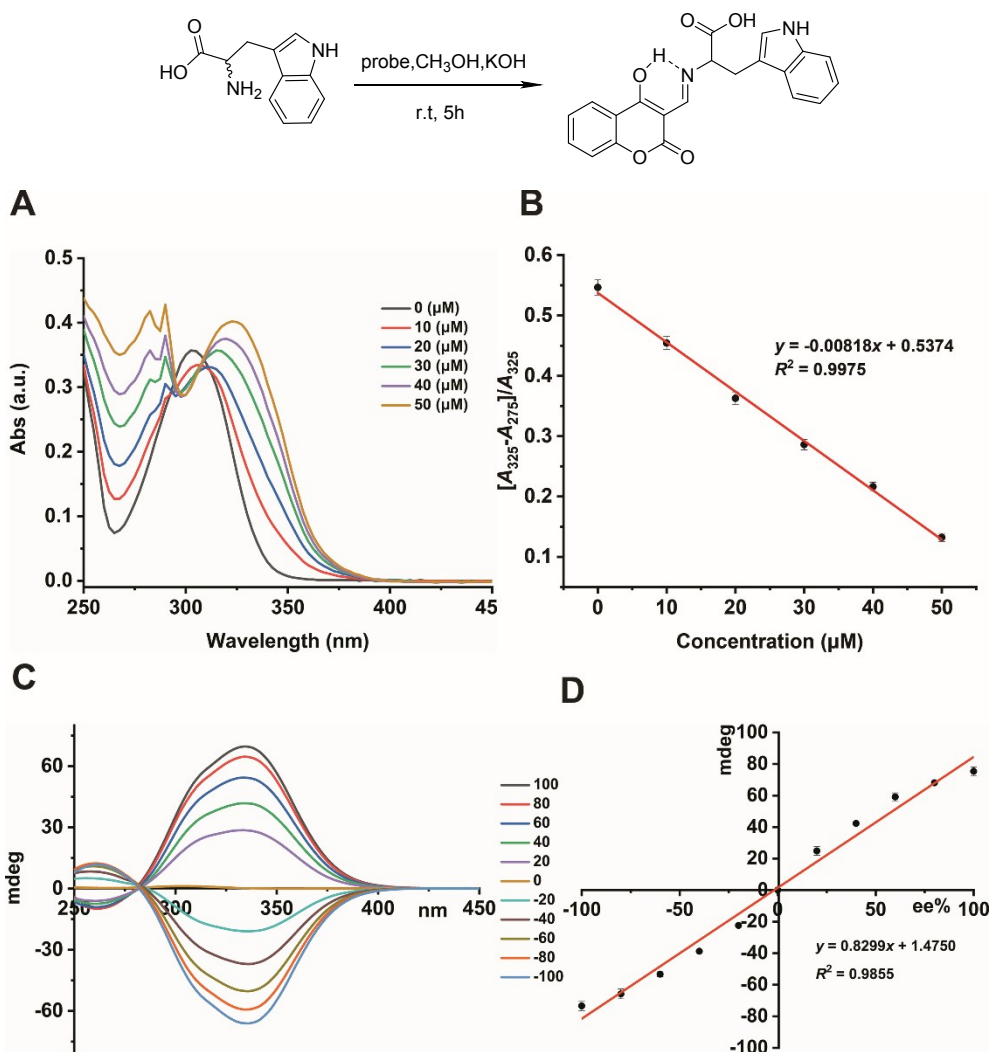

Fig. S22. Chiroptical sensing of Trp. (A) UV-vis response of **1** to varying amounts of Trp. (B)

linear correlation between absorbance and concentration of Trp. (C) CD response of **1** to nonracemic sample of Trp, and (D) linear correlation between the induced CD signal at 336 nm and the sample *ee*.

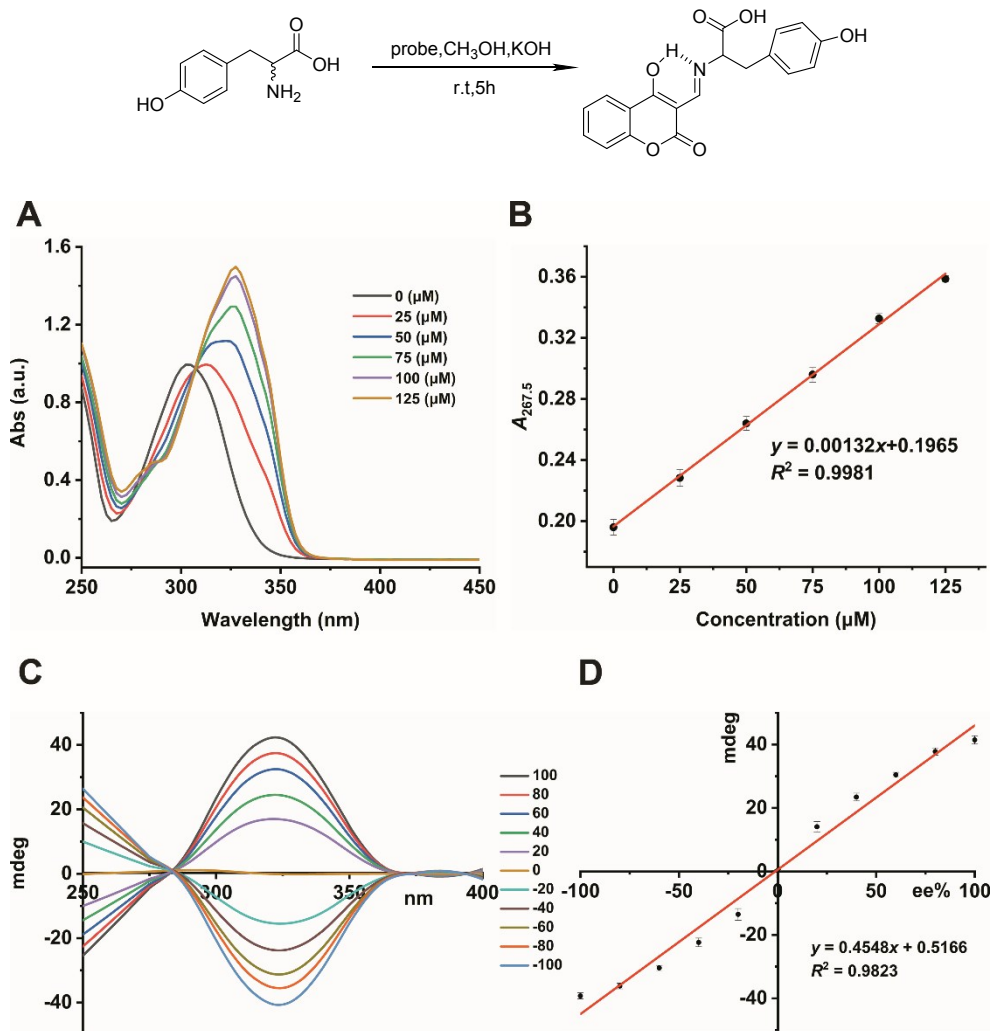

**Fig. S23.** Chiroptical sensing of Tyr. (A) UV-vis response of **1** to varying amounts of Tyr. (B) linear correlation between absorbance and concentration of Tyr. (C) CD response of **1** to nonracemic sample of Tyr, and (D) linear correlation between the induced CD signal at 323 nm and the sample *ee*.

**Tab. S1.** The detection limits of 12 amino acids.

| Amino acids | Detection limit ( $\mu\text{M}$ ) | Amino acids | Detection limit ( $\mu\text{M}$ ) |
|-------------|-----------------------------------|-------------|-----------------------------------|
| Phe         | 0.11                              | Gln         | 0.42                              |
| Trp         | 0.31                              | Glu         | 0.43                              |
| Tyr         | 1.02                              | Ile         | 0.46                              |
| His         | 0.46                              | Leu         | 0.37                              |
| Asp         | 0.48                              | Met         | 0.44                              |
| Arg         | 0.35                              | Val         | 0.37                              |

**Tab. S2.** The detection limits of amino acids in this work compared with other methods.

| Amino acids | Detection limit ( $\mu\text{M}$ ) | Ref.      |
|-------------|-----------------------------------|-----------|
| Trp         | 0.33                              | 45        |
|             | 2.1                               | 46        |
|             | 27 (L-Trp), 44 (D-Trp)            | 47        |
|             | 0.31                              | this work |
| Tyr         | 33                                | 48        |
|             | 10.3                              | 49        |
|             | 1.02                              | this work |
| His         | 67.5                              | 50        |
|             | 11                                | 51        |
|             | 0.46                              | this work |
| Arg         | 1.29 (L-Arg), 0.023 (D-Arg)       | 52        |
|             | 0.35                              | this work |

**Tab. S3.** Concentration of phenylalanine determined by UV responses of probe **1**.

| Actual<br>Concentration<br>( $\mu\text{M}$ ) | Calculated<br>Concentration<br>( $\mu\text{M}$ ) |
|----------------------------------------------|--------------------------------------------------|
| 33.1                                         | 37.8 $\pm$ 0.27                                  |
| 61.3                                         | 62.0 $\pm$ 1.19                                  |
| 86.3                                         | 90.5 $\pm$ 1.34                                  |
| 116.9                                        | 120.9 $\pm$ 0.85                                 |

**Tab. S4.** Concentration, *ee* and absolute configuration of samples of Trp determined by the combined UV and CD responses of probe 1.

| Entry | Sample composition |                         |             | Sensing results |                         |                  |
|-------|--------------------|-------------------------|-------------|-----------------|-------------------------|------------------|
|       | Abs.config.        | Conc. ( $\mu\text{M}$ ) | % <i>ee</i> | Abs.config.     | Conc. ( $\mu\text{M}$ ) | % <i>ee</i>      |
| 1     | L                  | 30.0                    | -16.6       | L               | 29.1 $\pm$ 0.67         | -14.9 $\pm$ 1.24 |
| 2     | D                  | 50.0                    | 30.0        | D               | 50.6 $\pm$ 0.89         | 26.5 $\pm$ 0.25  |
| 3     | L                  | 14.0                    | -28.6       | L               | 13.00 $\pm$ 0.91        | -22.8 $\pm$ 0.43 |
| 4     | D                  | 37.5                    | 33.3        | D               | 38.57 $\pm$ 0.38        | 31.2 $\pm$ 0.67  |
| 5     | L                  | 23.5                    | -70.2       | L               | 21.28 $\pm$ 0.84        | -72.6 $\pm$ 0.44 |
| 6     | D                  | 30.0                    | 50.0        | D               | 30.31 $\pm$ 0.14        | 46.6 $\pm$ 0.26  |

**Tab. S5.** Concentration, *ee* and absolute configuration of samples of Tyr determined by the combined UV and CD responses of probe 1.

| Entry | Sample composition |                         |             | Sensing results |                         |                  |
|-------|--------------------|-------------------------|-------------|-----------------|-------------------------|------------------|
|       | Abs.config.        | Conc. ( $\mu\text{M}$ ) | % <i>ee</i> | Abs.config.     | Conc. ( $\mu\text{M}$ ) | % <i>ee</i>      |
| 1     | D                  | 100.0                   | 25.0        | D               | 103.4 $\pm$ 2.47        | 23.0 $\pm$ 1.39  |
| 2     | L                  | 56.2                    | -33.3       | L               | 53.3 $\pm$ 1.14         | -27.4 $\pm$ 0.17 |
| 3     | D                  | 68.8                    | 45.4        | D               | 72.7 $\pm$ 1.37         | 40.6 $\pm$ 0.37  |
| 4     | L                  | 62.5                    | -52.0       | L               | 65.0 $\pm$ 1.29         | -59.9 $\pm$ 2.43 |
| 5     | D                  | 87.5                    | 28.6        | D               | 80.9 $\pm$ 0.94         | 25.0 $\pm$ 0.57  |
| 6     | L                  | 50.0                    | -40.0       | L               | 55.1 $\pm$ 1.78         | -35.9 $\pm$ 0.74 |

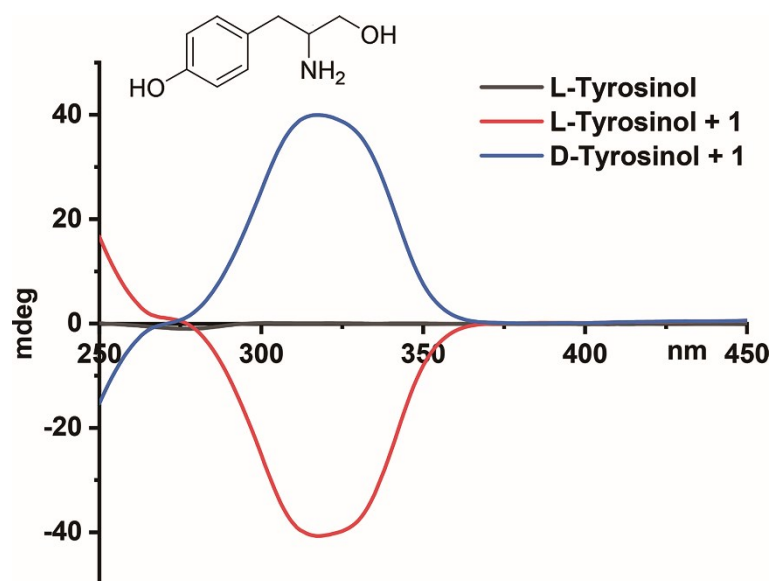

**Fig. S24.** CD spectra obtained from probe 1 with L- tyrosinol (red), D- tyrosinol (blue) and L- tyrosinol (black). (CD measurements were taken at 250  $\mu$ M after diluting with methanol)

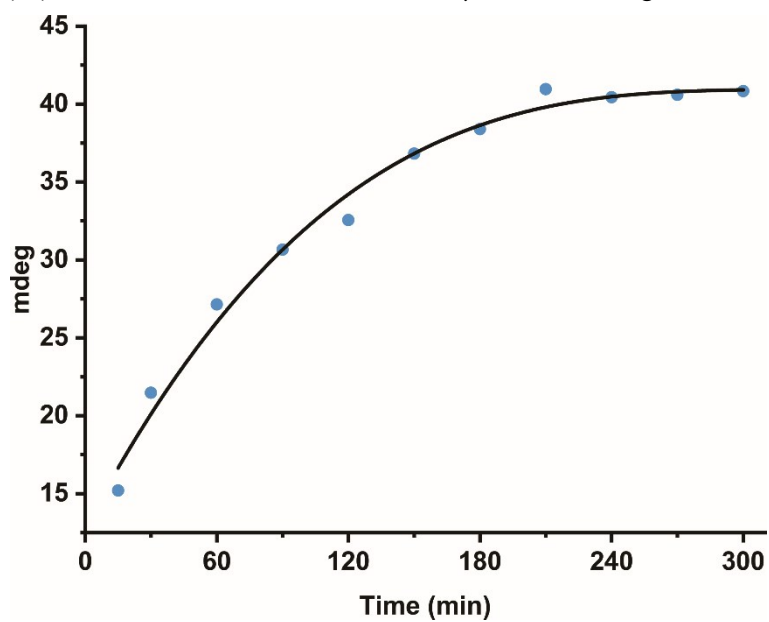

**Fig. S25.** CD analysis of the reaction between D- tyrosinol and probe 1. (CD signals were collected at 320 nm)

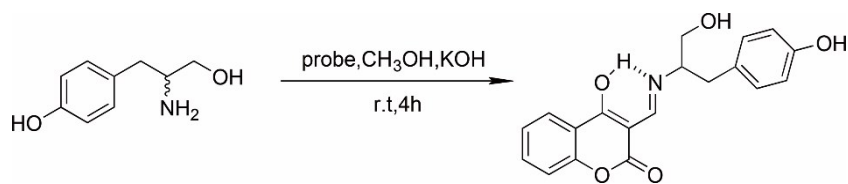



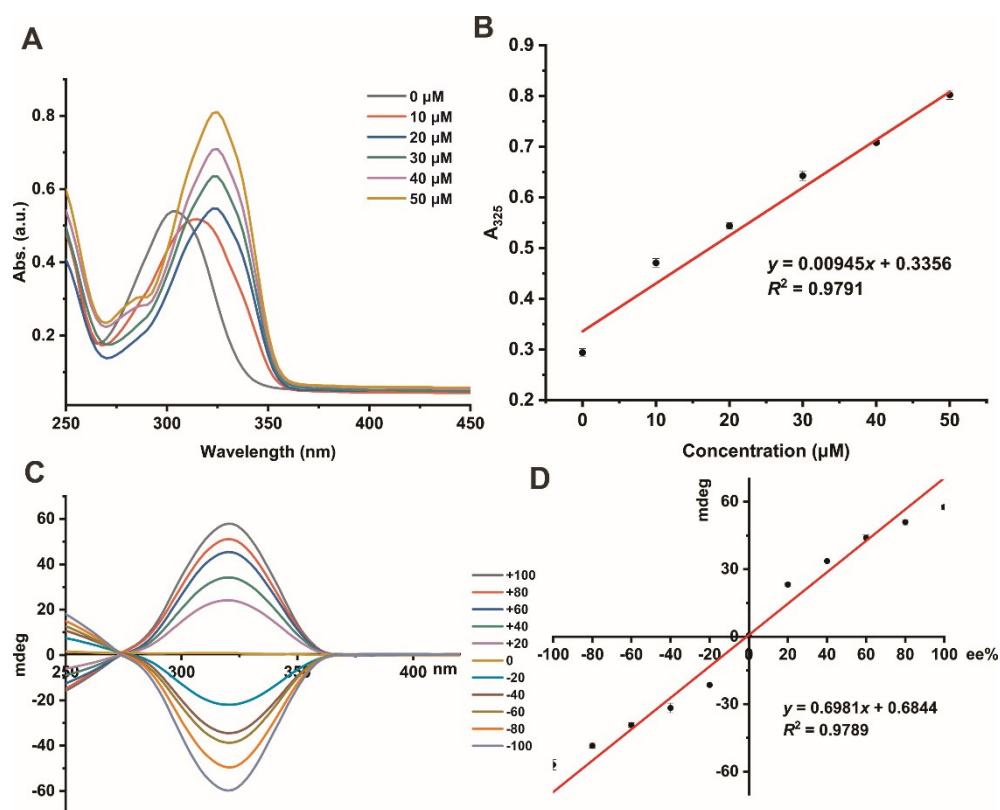

**Fig. S26.** Chiroptical sensing of tyrosinol. (A) UV-vis response of 1 to varying amounts of tyrosinol. (B) linear correlation between absorbance and concentration of tyrosinol. (C) CD response of 1 to nonracemic sample of tyrosinol, and (D) linear correlation between the induced CD signal at 320 nm and the sample *ee*.

**Tab. S6.** Concentration, *ee* and absolute configuration of samples of tyrosinol determined by the combined UV-vis and CD responses of probe 1.

| Entry | Sample composition |            |       | Sensing results |            |            |
|-------|--------------------|------------|-------|-----------------|------------|------------|
|       | Abs.config.        | Conc. (μM) | % ee  | Abs.config.     | Conc. (μM) | % ee       |
| 1     | L                  | 14.0       | -28.6 | L               | 13.1±0.23  | -28.1±1.17 |
| 2     | D                  | 50.0       | 33.3  | D               | 48.0±0.60  | 35.6±0.83  |
| 3     | L                  | 23.5       | -40.0 | L               | 21.3±0.26  | -41.6±0.61 |
| 4     | D                  | 30.0       | 50.0  | D               | 28.9±0.73  | 54.8±0.40  |
| 5     | L                  | 40.0       | -50.0 | L               | 41.0±0.82  | -52.0±0.82 |
| 6     | D                  | 35.0       | 16.6  | D               | 34.9±0.18  | 14.4±0.93  |
